# Supplementary material
Source: PubMed Central journal article supplement (PMC7613875)

# SUPPLEMENTARY MATERIAL

**Title: Climatic similarity and genomic background shape the extent of parallel adaptation in *Timema* stick insects**

**Short title: Parallel adaptation to climate**

Samridhi Chaturvedi<sup>1,2\*</sup>, Zachariah Gompert<sup>2\*</sup>, Jeffrey L. Feder<sup>3</sup>, Owen G. Osborne<sup>4</sup>, Moritz Muschick<sup>5,6</sup>, Rüdiger Riesch<sup>7</sup>, Víctor Soria-Carrasco<sup>8</sup> and Patrik Nosil<sup>2,9</sup>

<sup>1</sup>Department of Integrative Biology, University of California, Berkeley, California 94703 USA

<sup>2</sup>Department of Biology and Ecology Center, Utah State University, Logan, Utah 84322, USA

<sup>3</sup>Department of Biological Sciences, University of Notre Dame, Notre Dame, Indiana 46556, USA

<sup>4</sup>Molecular Ecology and Evolution Bangor, Environment Centre Wales, School of Natural Sciences, Bangor University, Bangor, LL57 2UW, UK

<sup>5</sup>Aquatic Ecology & Evolution, Institute of Ecology and Evolution, University of Bern, CH-3012, Switzerland

<sup>6</sup>Department of Fish Ecology & Evolution, Eawag, Swiss Federal Institute for Aquatic Science and Technology, CH-6047, Kastanienbaum, Switzerland

<sup>7</sup>Department of Biological Sciences, Royal Holloway University of London, Egham, TW20 9EX, UK

<sup>8</sup>The John Innes Center, Norwich Research Park, Norwich, NR4 7UH, UK

<sup>9</sup>CEFE, Univ Montpellier, CNRS, EPHE, IRD, Univ Paul Valéry Montpellier 3, Montpellier, France

\*Corresponding authors (Emails: Samridhi Chaturvedi – samridhi.chaturvedi@gmail.com; Zachariah Gompert – zach.gompert@usu.edu)

## SUPPLEMENTARY METHODS

### Climate-associated SNP windows and cuticular hydrocarbon variation

We tested for excess overlap between climate-associated SNP windows and genomic regions associated with cuticular hydrocarbon (CHC) variation. The logic here is that CHCs often play a role in desiccation tolerance and climatic adaptation in insects (e.g., [1]), such that genetic regions associated with climate versus CHCs might overlap. We thus specifically quantified the extent to which climate-associated SNP windows overlapped with windows harboring SNPs associated with CHCs, and whether this overlap was greater than expected by chance. The CHC data were originally described and analyzed by [2]. Specifically, for each insect, we had quantified the proportional abundance of 26 different mono- and di-methylated CHCs, which comprised eight pentacosanes, eight heptacosanes and ten nonacosanes, and then applied log-

36 contrasts. For the current dataset, we used those values to calculate the proportional abundance  
37 of the sum of all pentacosanes, the sum of all heptacosanes and the sum of all nonacosanes  
38 (henceforth: pentacosanes, heptacosanes and nonacosanes). Therefore, the six CHC traits  
39 considered were pentacosanes, heptacosanes, and nonacosanes in males and females (i.e., three  
40 molecule types in each of two sexes = six traits total).

41 Here, we first re-aligned the GBS data from [2] to the current (i.e., more recent and less  
42 fragmented) *T. cristinae* genome (draft version 0.3). This included GBS data from 395 male and  
43 195 female *T. cristinae* all collected from a single population (FHA), and all of which for CHC  
44 data was also collected. These data were aligned to the genome using the BWA ALN algorithm  
45 (version 0.7.17-r1188) [4]. We allowed for 5 mismatches total, and not more than 2 miss-  
46 matches in the first 20 bp. Only reads with a mapping quality greater than 10 were retained. We  
47 then compressed, sorted, and indexed the alignments with SAMTOOLS and BCFTOOLS  
48 (version 1.2) [5,6]. Next, we used SAMTOOLS and BCFTOOLS to identify SNPs and calculate  
49 genotype likelihoods. For this, we used the recommended mapping quality adjustment (-C 50),  
50 only considered alignments with mapping qualities of 20 or more and SNPs with base qualities  
51 of 30 or more, and only called variants when the posterior probability that the locus was  
52 invariant was less than 0.01 given a prior mutation rate parameter of 0.001. We then used custom  
53 Perl scripts to filter out variants with a mean coverage of less than 2x, fewer than 10 non-  
54 reference reads total, mapping quality less than 30, minor allele frequency less than ~0.005, more  
55 than 1% of reads in the reverse orientation (with our GBS method, all reads should have the  
56 same orientation), missing data (no reads) for more than 20% of individuals, SNPs with more  
57 than two alleles, and SNPs with coverage exceeding three standard deviations above the mean.  
58 Finally, we obtained Bayesian point estimates (posterior means) of genotypes for each locus and  
59 individual based on the genotype likelihoods and used the estimated allele frequencies to  
60 parameterize a binomial prior.

61 We then conducted genetic mapping of CHC variation using a polygenic genome-wide  
62 association (GWA) mapping approach, that controls for linkage disequilibrium among SNPs and  
63 background population structure as detailed below. We specifically fit Bayesian sparse linear  
64 mixed models (BSLMMs) to determine the contribution of additive genetic variation (as  
65 captured by our collective SNP data set) to each of six CHC traits, and to determine the

66 probability of association (posterior inclusion probability, PIP) of each individual SNP with each  
67 trait (this PIP value is computed from, i.e., equal to, the proportion of MCMC samples that  
68 included each SNP in the polygenic regression model). We fit this model using gemma (version  
69 0.95a) [7], a polygenic GWA mapping method that fits a single model with all SNPs while  
70 accounting for uncertainty and redundancy in genotype-phenotype associations, for example by  
71 controlling for linkage disequilibrium among SNPs, and background polygenic effects. The latter  
72 is inferred based on a kinship matrix derived from the collective SNPs, which also serves to  
73 control for population structure when estimating effects for individual SNPs. Models were fit  
74 using MCMC, with each mapping exercise involving 10 independent chains each comprising 1  
75 million sampling iterations and a 200,000-iteration burn-in.

76 Based on these analyses, we then computed the mean posterior inclusion probability or PIP (i.e.,  
77 probability of a genotype-phenotype association) across all SNPs in 100 Kb windows for each of  
78 the six CHC traits. Then, we asked whether the average association with CHCs (averaged over  
79 windows) was higher for the climate-associated SNP windows than expected by chance.  
80 Randomisations (1000) were used to generate a null distribution. Specifically, mean posterior  
81 probabilities for SNP-CHC associations were permuted across 1000 Kb windows and the number  
82 windows in the top 10% for climate association and (permuted) CHC posterior inclusion  
83 probabilities was determined. Note that we conducted this test independently for each of the six  
84 CHC traits and each of the three climate PCs. We then examined the combination of these results  
85 to assess the total evidence that SNP windows associated with climate adaptation are enriched  
86 for those regions of the genome possibly affecting CHC variation.

### 87 **Identifying introgression and population structure**

88 We quantified both historical and contemporary gene flow patterns, respectively as follows. For  
89 identifying historical introgression, we used TREEMIX (version 1.13) [8] to construct a  
90 population-based phylogeny to identify historical admixture or gene flow among our 53 focal  
91 populations. This differed from previous TREEMIX analysis done for *Timema* species where we  
92 used the data only from the *Mel-Stripe* locus [3]. For the analysis in our study here, we re-  
93 aligned the GBS sequences for 1420 individuals (across 53 populations) included in this study to  
94 the *T. cristinae* genome (draft version 0.3). We did this by using the MEM algorithm from BWA  
95 (version 0.7.17-r1188). We ran BWA MEM with a minimum seed length of 15, internal seeds of

96 longer than 20 bp, and only output alignments with a quality score  $\geq 30$ . We then used  
97 SAMTOOLS (version 1.6) to compress, sort and index the alignments [5,6]. We then identified  
98 SNPs using SAMTOOLS and BCFTOOLS (version 1.6). For variant calling, we used a mapping  
99 quality of 50, skipped alignments with mapping quality lower than  $< 20$ , skipped bases with base  
100 quality  $< 15$ , and ignored insertion-deletion polymorphisms. We set the prior on SNPs to 0.001  
101 and called SNPs when the posterior probability that the nucleotide was invariant was  $\leq 0.01$ .  
102 After we got the initial set of variants, we filtered them to retain only those SNPs with sequence  
103 data for at least 80% individuals, a mean sequence depth of two per individual, at least 4 reads of  
104 the alternative allele, a minimum quality score of 30, a minimum overall minor allele frequency  
105 of at least 0.005, and no more than 1% of the reads in the reverse orientation (this is an  
106 expectation for our GBS method). We further removed SNPs with excessive coverage (3  
107 standard deviations above the mean) or that were tightly clustered (within 3 bp of each other), as  
108 these could be poor alignments (e.g., reads from multiple paralogs mapping to the same region of  
109 the genome). This left us with 8787 SNPs for this analysis. We used custom perl scripts to  
110 calculate genotype likelihoods for these SNPs and then used expectation-maximization algorithm  
111 to obtain maximum-likelihood estimates of population allele frequencies while accounting for  
112 uncertainty in genotypes (based on the calculated genotype likelihoods from BCFTOOLS).  
113 Finally, we used TREEMIX to construct *Timema* population graphs based on the matrix of allele  
114 frequency covariance between pairs of populations. We fit trees allowing 0-9 admixture events  
115 and calculate the proportion of variance in allele frequency variances explained by the  
116 population tree with the varying numbers of admixture events. This way we could determine the  
117 extent to which individual admixture events improved model fit.

118 For estimating contemporary gene flow, we implemented the admixture model from ENTROPY  
119 (version 1.2) [9]. This analysis yielded similar results as previously reported using the same  
120 model [2]. From ENTROPY, we obtained Bayesian estimates of genotypes and admixture  
121 proportions. This analysis was performed separately for each species- and species-specific set of  
122 SNPs. We did this to identify contemporary gene flow within species to understand if gene flow  
123 could affect parallelism in response to climate. The admixture model in ENTROPY is similar to  
124 that in STRUCTURE [10] but differs by accounting for uncertainty in genotypes arising from  
125 finite sequence coverage and sequence errors, and by allowing simultaneous estimation of

126 genotypes and admixture proportions. For each species, we fit the model with  $k \in \{2 \dots 5\}$  source  
127 populations. For each value of  $k$ , we ran three MCMC chains, each with 8000 iterations, a burn-  
128 in of 5000 iterations and a thinning interval of 3. We used assignments from a discriminant  
129 analysis of principal components to initialize the MCMC algorithm; this speeds convergence to  
130 the posterior and avoids label switching during MCMC without affecting the posterior  
131 probability distribution. We obtained genotype estimates as the posterior mean allele count for  
132 each individual and locus across chains and values of  $k$  (i.e., this integrates over uncertainty in  
133 the number of hypothetical source populations). We summarized patterns of population structure  
134 and admixture across the sampled populations and individuals based on these admixture  
135 proportions for  $k=2$  and a principal component analysis (PCA) of the genotypic data. We then  
136 used the `prcomp` function [11] to perform a PCA in R (3.4) on the centered, but unstandardized  
137 genotype matrix.

## 138 139 **SUPPLEMENTARY RESULTS**

### 140 141 **Climate-associated SNP windows and CHCs**

142 In addition to the test for natural selection using the field experiment, we conducted additional  
143 tests using genetic mapping of cuticular hydrocarbons (CHCs) in *Timema cristinae*. For the CHC  
144 analyses, we considered three compound classes - pentacosanes, heptacosanes, and nonacosanes  
145 - in males and in females (i.e., three compounds x two sexes = six CHC traits total). We found  
146 evidence of heritable variation for each compound in both male and female *T. cristinae*, with  
147 50.8% (male nonacosanes) to 89.7% (female pentacosanes) of the variability in these traits  
148 explained by a total of ~176 thousand sequenced SNPs in a mapping population (these values  
149 denote Bayesian point estimates based on 602 *T. cristinae* from a single population, FHA) (see  
150 Supplementary Table 5 for details). We summarized the evidence that each 100 Kb window  
151 included CHC-associated SNPs by computing the mean posterior probability of association (i.e.,  
152 the mean probability of a non-zero genotype-phenotype association, also known as the posterior  
153 inclusion probability or PIP) across SNPs in the same 100 Kb windows used for summarizing  
154 SNP-climate associations. Based on a randomisation test, we found that for some CHC traits the  
155 average posterior inclusion probability for SNPs in the top climate-associated SNP windows in  
156 *T. cristinae* was marginally but significantly greater than expected by chance. Specifically, the

157 average probability of SNPs being associated with female pentacosanes was ~1.05 times higher  
158 than expected by chance for both the top 10% of PC2 and PC3 climate-associated SNP windows  
159 ( $P$ -value = 0.009 for PC2 and  $P$ -value = 0.010 for PC3 based on 1000 permutations;  
160 Supplementary Tables 7 and 8). We also detected a marginally non-significant increase in the  
161 average posterior inclusion probability for SNP associations with female nonacosanes in the top  
162 10% of PC3 climate-associated SNP windows (x-fold increase in mean inclusion probability =  
163 1.03,  $P$ -value = 0.051, 1000 permutations, Supplementary Table 8). We did not detect any  
164 significant overlap of SNPs associated with CHCs and those associated with PC1 climate  
165 windows (Supplementary Table 6). These results for CHCs support the hypothesis that at least a  
166 subset of the top climate-associated SNP windows is associated with traits involved in climatic  
167 adaptation in *Timema*.

### 168 **Introgression does not contribute to parallel evolution**

169 We conducted two analyses, focused on different time scales, to ask if introgression and gene  
170 flow between species promotes gene sharing and thus climate-associated parallel evolution. First,  
171 we identified historical patterns of introgression using a population tree-based approach. Second,  
172 we identified contemporary patterns of gene flow using an admixture model. Both these analyses  
173 helped us to assess the degree of genetic independence in adaptation to climate within each  
174 species.

175 To identify historical patterns of introgression, we used TREEMIX to generate a tree for all  
176 populations and species, allowing for historical admixture or gene flow among intra-specific or  
177 inter-specific populations. For this analysis, we realigned GBS sequence data for all 1420  
178 individuals included in this study to the *T. cristinae* genome. We then called and filtered single  
179 nucleotide polymorphisms (SNPs) to identify a final set of 8787 SNPs for the TREEMIX  
180 analysis. Our results from TREEMIX yielded a population graph or bifurcating tree depicting  
181 relationships between focal localities in the study. The best bifurcating tree explained 99.6% of  
182 the variation in the population allele-frequency covariances. In this tree, *Timema* populations  
183 formed eight major clades that grouped populations by species (Figure 5A). Adding migration  
184 edges to the tree increased the variance explained by a negligible extent (Supplementary Table  
185 9), as expected given that the tree with no migration edges explained the overwhelming majority  
186 of the variation in the data. These results are consistent with two previous findings that little to

187 no evidence for introgression was observed in analogous analyses focused on the *Mel-Stripe*  
188 locus and that divergence times for the eight species in the current study ranged between 10 – 30  
189 million years, which indicates that *Timema* represent an old radiation [3].

190 We further used the admixture model from ENTROPY (version 1.2) to infer contemporary gene  
191 flow (see methods for details). Here, we focused our analyses on pairs of species and, thus, on  
192 admixture proportions for  $k=2$  to identify individuals of possible hybrid ancestry. We  
193 summarized patterns of population structure and admixture across the sampled populations and  
194 individuals based on these admixture proportions in principal component analyses (PCA) of the  
195 genotypic data (Supplementary Figures 7-9). As previously reported [2], we detected minimal  
196 evidence for contemporary admixture between species in the ENTROPY analysis. Together  
197 these results imply that introgression and gene flow do not strongly or regularly influence the  
198 dynamics of parallel adaptation to climate in these species.

199

200 SUPPLEMENTARY CITATIONS

- 201 1. Rajpurohit, S., R. Hanus, V. Vrkoslav, E. L. Behrman, A. O. Bergland, D. Petrov,  
202 J. Cvačka, and P. S. Schmidt. 2017. “Adaptive Dynamics of Cuticular  
203 Hydrocarbons in *Drosophila*.” *Journal of Evolutionary Biology* 30 (1): 66–80.  
204 2. Riesch, Rüdiger, Moritz Muschick, Dorothea Lindtke, Romain Villoutreix, Aaron  
205 A. Comeault, Timothy E. Farkas, Kay Lucek, et al. 2017. “Transitions between  
206 Phases of Genomic Differentiation during Stick-Insect Speciation.” *Nature  
207 Ecology & Evolution* 1 (4): 82.  
208 3. Villoutreix, Romain, Clarissa F. de Carvalho, Víctor Soria-Carrasco, Dorothea  
209 Lindtke, Marisol De-la-Mora, Moritz Muschick, Jeffrey L. Feder, Thomas L.  
210 Parchman, Zach Gompert, and Patrik Nosil. 2020. “Large-Scale Mutation in the  
211 Evolution of a Gene Complex for Cryptic Coloration.” *Science (New York, N.Y.)*  
212 369 (6502): 460–66.  
213 4. Li, Heng. 2013. “Aligning Sequence Reads, Clone Sequences and Assembly  
214 Contigs with BWA-MEM.” *ArXiv [q-Bio.GN]*. arXiv.  
215 <http://arxiv.org/abs/1303.3997>.  
216 5. Li, Heng, Bob Handsaker, Alec Wysoker, Tim Fennell, Jue Ruan, Nils Homer,  
217 Gabor Marth, Goncalo Abecasis, Richard Durbin, and 1000 Genome Project Data  
218 Processing Subgroup. 2009. “The Sequence Alignment/Map Format and  
219 SAMtools.” *Bioinformatics (Oxford, England)* 25 (16): 2078–79.  
220 6. Danecek, Petr, James K. Bonfield, Jennifer Liddle, John Marshall, Valeriu Ohan,  
221 Martin O. Pollard, Andrew Whitwham, et al. 2021. “Twelve Years of SAMtools  
222 and BCFtools.” *GigaScience* 10 (2). <https://doi.org/10.1093/gigascience/giab008>.  
223 7. Zhou, Xiang, Peter Carbonetto, and Matthew Stephens. 2013. “Polygenic  
224 Modeling with Bayesian Sparse Linear Mixed Models.” *PLoS Genetics* 9 (2):  
225 e1003264.  
226 8. Pickrell, Joseph K., and Jonathan K. Pritchard. 2012. “Inference of Population  
227 Splits and Mixtures from Genome-Wide Allele Frequency Data.” *PLoS Genetics*  
228 8 (11): e1002967.  
229 9. Gompert, Zachariah, Lauren K. Lucas, C. Alex Buerkle, Matthew L. Forister,  
230 James A. Fordyce, and Chris C. Nice. 2014. “Admixture and the Organization of  
231 Genetic Diversity in a Butterfly Species Complex Revealed through Common and  
232 Rare Genetic Variants.” *Molecular Ecology* 23 (18): 4555–73.  
233 10. Pritchard, J. K., M. Stephens, and P. Donnelly. 2000. “Inference of Population  
234 Structure Using Multilocus Genotype Data.” *Genetics* 155 (2): 945–59.  
235 11. Kassambara, Alboukadel. 2019. *Practical Statistics in R for Comparing Groups*.  
236 *Practical Statistics in R 2*. Independently Published.



237 **SUPPLEMENTARY TABLES**  
238

239 Supplementary Table 1: Locality information and sample sizes for the eight species and 53 localities for which  
240 the GBS data has been included in this study. The GBS data associated with these populations and individuals  
241 was first presented in [2].

| <b>Species</b>         | <b>No. of populations</b> | <b>No. of individuals</b> |
|------------------------|---------------------------|---------------------------|
| <i>T. bartmani</i>     | 6                         | 195                       |
| <i>T. californicum</i> | 3                         | 77                        |
| <i>T. chumash</i>      | 12                        | 358                       |
| <i>T. cristinae</i>    | 6                         | 205                       |
| <i>T. knulli</i>       | 5                         | 89                        |
| <i>T. landelsensis</i> | 4                         | 125                       |
| <i>T. podura</i>       | 12                        | 255                       |
| <i>T. poppensis</i>    | 5                         | 116                       |

242

243 Supplementary Table 2: Details of climate variables included in this study and loadings for the first three PCs  
244 (Total proportion of variation explained by each PC: PC1 = 51.7%, PC2 = 24.4% and PC3 = 16.1%).

245

| <b>Code</b> | <b>Description</b>                                         | <b>PC1</b> | <b>PC2</b> | <b>PC3</b> |
|-------------|------------------------------------------------------------|------------|------------|------------|
| BIO1        | Annual Mean Temperature                                    | -0.24      | 0.21       | 0.15       |
| BIO2        | Mean Diurnal Range (Mean of monthly (max temp - min temp)) | 0.17       | 0.19       | 0.03       |
| BIO3        | Isothermality (BIO2/BIO7) (×100)                           | -0.22      | -0.12      | -0.24      |
| BIO4        | Temperature Seasonality (standard deviation ×100)          | 0.25       | 0.16       | 0.19       |
| BIO5        | Max Temperature of Warmest Month                           | 0.06       | 0.33       | 0.31       |
| BIO6        | Min Temperature of Coldest Month                           | -0.29      | 0.03       | 0.04       |
| BIO7        | Temperature Annual Range (BIO5-BIO6)                       | 0.25       | 0.19       | 0.17       |
| BIO8        | Mean Temperature of Wettest Quarter                        | -0.29      | 0.08       | 0.03       |
| BIO9        | Mean Temperature of Driest Quarter                         | -0.1       | 0.29       | 0.34       |
| BIO10       | Mean Temperature of Warmest Quarter                        | -0.02      | 0.34       | 0.33       |
| BIO11       | Mean Temperature of Coldest Quarter                        | -0.29      | 0.06       | 0.01       |
| BIO12       | Annual Precipitation                                       | 0.09       | -0.32      | 0.31       |
| BIO13       | Precipitation of Wettest Month                             | 0.02       | -0.32      | 0.36       |
| BIO14       | Precipitation of Driest Month                              | 0.26       | -0.14      | -0.04      |
| BIO15       | Precipitation Seasonality (Coefficient of Variation)       | -0.25      | -0.01      | 0.18       |
| BIO16       | Precipitation of Wettest Quarter                           | 0.04       | -0.31      | 0.36       |
| BIO17       | Precipitation of Driest Quarter                            | 0.27       | -0.06      | -0.11      |
| BIO18       | Precipitation of Warmest Quarter                           | 0.28       | -0.05      | -0.07      |
| BIO19       | Precipitation of Coldest Quarter                           | 0.04       | -0.32      | 0.34       |
| Elev        | Elevation                                                  | 0.29       | 0          | -0.02      |
| Lat         | Latitude                                                   | -0.19      | -0.25      | 0.08       |
| Long        | Longitude                                                  | 0.25       | 0.19       | -0.02      |

246

247

248

249

250

251

252

253 Supplementary Table 3. Summary of model posterior predictive performance as approximated by the deviance  
 254 information criterion (DIC) for models predicting parallelism as a function of genes and ecology. The full  
 255 model in each case (for each PC) includes genes and ecology, and the null model includes only an intercept  
 256 term. D gives the mean deviance and pD denotes the effective number of parameters. Lower DIC values  
 257 denote better models. The best model for each PC is highlighted in bold.  
 258

| PC  | Model        | D            | pD           | DIC         |
|-----|--------------|--------------|--------------|-------------|
| PC1 | Full         | 51.03        | 12.17        | 63.2        |
|     | <b>Genes</b> | <b>52.04</b> | <b>11.03</b> | <b>63.1</b> |
|     | Ecology      | 69.55        | 10.27        | 79.8        |
|     | Null         | 76.1         | 5            | 81.1        |
| PC2 | Full         | 81.38        | 4.95         | 86.3        |
|     | Genes        | 80.59        | 3.89         | 84.5        |
|     | Ecology      | 84.18        | 3.98         | 85.2        |
|     | <b>Null</b>  | <b>80.48</b> | <b>2.85</b>  | <b>83.3</b> |
| PC3 | <b>Full</b>  | <b>68.32</b> | <b>5.64</b>  | <b>74</b>   |
|     | Genes        | 74.95        | 4.51         | 79.5        |
|     | Ecology      | 78.03        | 3.88         | 81.9        |
|     | Null         | 80.2         | 2.9          | 83.1        |

259

260 Supplementary Table 4. Excess overlap between top climate-associations windows and those where change  
 261 was mostly strongly correlated with elevation in the release-recapture experiment. Results are shown for  
 262 different top quantiles. Here 0.90 indicates the top 10% of windows, which corresponds to the results in the  
 263 main text. We report the observed number of windows in the top quantiles for both change and climate  
 264 association, the x-fold enrichment relative to null expectations, and the corresponding P-value for each PC  
 265 climate variable. Results are shown for null distributions where all windows were permuted or randomized  
 266 (“Full randomisation”) and where randomisations were limited to windows with similar numbers of SNPs  
 267 (“Constrained randomisation”). *P*-values  $\leq .05$  are highlighted in bold. Significant *P*-values denote whether the  
 268 overlap is greater than expected by chance from a one-sided randomisation test.  
 269

| PC1      |          |                    |                 |                           |                |
|----------|----------|--------------------|-----------------|---------------------------|----------------|
|          |          | Full randomisation |                 | Constrained randomisation |                |
| Quantile | Observed | X-fold             | P-value         | X-fold                    | P-value        |
| 0.9      | 108      | 1.40               | <b>0.00001</b>  | 1.24                      | <b>0.005</b>   |
| 0.91     | 86       | 1.39               | <b>0.0012</b>   | 1.19                      | <b>0.040</b>   |
| 0.92     | 75       | 1.53               | <b>0.00021</b>  | 1.29                      | <b>0.014</b>   |
| 0.93     | 59       | 1.56               | <b>0.00008</b>  | 1.29                      | <b>0.013</b>   |
| 0.94     | 48       | 1.72               | <b>0.000012</b> | 1.36                      | <b>0.014</b>   |
| 0.95     | 43       | 2.21               | <b>0.00054</b>  | 1.65                      | <b>0.00012</b> |
| 0.96     | 33       | 2.68               | <b>0.0001</b>   | 1.84                      | <b>0.001</b>   |
| 0.97     | 25       | 3.58               | <b>0.00032</b>  | 2.29                      | <b>0.0004</b>  |
| 0.98     | 15       | 4.83               | <b>0.00002</b>  | 2.63                      | <b>0.001</b>   |
| 0.99     | 6        | 7.47               | <b>0.00001</b>  | 3.07                      | 0.14           |
| PC2      |          |                    |                 |                           |                |
|          |          | Full randomisation |                 | Constrained randomisation |                |
| Quantile | Observed | X-fold             | P-value         | X-fold                    | P-value        |
| 0.9      | 101      | 1.32               | <b>0.003</b>    | 1.21                      | <b>0.015</b>   |
| 0.91     | 77       | 1.24               | <b>0.034</b>    | 1.12                      | 0.138          |
| 0.92     | 67       | 1.37               | <b>0.005</b>    | 1.21                      | 0.062          |
| 0.93     | 53       | 1.39               | <b>0.010</b>    | 1.22                      | 0.064          |
| 0.94     | 44       | 1.59               | <b>0.001</b>    | 1.32                      | <b>0.039</b>   |
| 0.95     | 36       | 1.86               | <b>0.00043</b>  | 1.45                      | <b>0.014</b>   |
| 0.96     | 28       | 2.29               | <b>0.000001</b> | 1.66                      | <b>0.003</b>   |
| 0.97     | 17       | 2.48               | <b>0.001</b>    | 1.64                      | <b>0.035</b>   |
| 0.98     | 9        | 2.92               | <b>0.004</b>    | 1.57                      | 0.122          |

|                 |                 |                           |                |                                  |                |
|-----------------|-----------------|---------------------------|----------------|----------------------------------|----------------|
| 0.99            | 2               | 2.58                      | 0.180          | 1.15                             | 0.534          |
| <b>PC3</b>      |                 |                           |                |                                  |                |
|                 |                 | <b>Full randomisation</b> |                | <b>Constrained randomisation</b> |                |
| <b>Quantile</b> | <b>Observed</b> | <b>X-fold</b>             | <b>P-value</b> | <b>X-fold</b>                    | <b>P-value</b> |
| 0.9             | 105             | 1.37                      | <b>0.00021</b> | 1.21                             | <b>0.021</b>   |
| 0.91            | 91              | 1.46                      | <b>0.00001</b> | 1.27                             | <b>0.005</b>   |
| 0.92            | 73              | 1.48                      | <b>0.001</b>   | 1.27                             | <b>0.012</b>   |
| 0.93            | 50              | 1.32                      | <b>0.019</b>   | 1.11                             | 0.232          |
| 0.94            | 40              | 1.45                      | <b>0.008</b>   | 1.17                             | 0.157          |
| 0.95            | 26              | 1.33                      | 0.068          | 1.04                             | 0.438          |
| 0.96            | 20              | 1.60                      | <b>0.027</b>   | 1.22                             | 0.188          |
| 0.97            | 12              | 1.72                      | <b>0.049</b>   | 1.25                             | 0.264          |
| 0.98            | 5               | 1.68                      | 0.188          | 1.04                             | 0.516          |
| 0.99            | 3               | 3.95                      | 0.028          | 2.50                             | 0.103          |

270  
271

272 Supplementary Table 5. Bayesian estimates of the percent of CHC variation explained by sequenced SNPs.  
 273 Estimates are from the polygenic GWA in gemma. The posterior median gives the point estimate of the  
 274 percent of CHC variation explained by the SNPs; the 95% equal-tail probability intervals (ETPIs) are also  
 275 given.  
 276

| <b>Trait</b>        | <b>Posterior median</b> | <b>95% ETPI</b> |
|---------------------|-------------------------|-----------------|
| Female pentacosanes | 89.7                    | 35.8-99.9       |
| Female heptacosanes | 52.5                    | 4.9-98.9        |
| Female nonacosanes  | 80.2                    | 15.5-99.8       |
| Male pentacosanes   | 53.2                    | 8.3-97.2        |
| Male heptacosanes   | 52.4                    | 10.3-96.5       |
| Male nonacosanes    | 50.8                    | 7.8-95.6        |

277  
 278  
 279

280 Supplementary Table 6: X-fold enrichments and associated *P*-values for number of overlapping SNP windows  
 281 for PC1 for comparison with genetic mapping of CHCs. Observed value gives the mean posterior inclusions  
 282 probability (i.e., probability of a genotype-phenotype association) across all SNPs in 100 Kb windows for each  
 283 of the six CHC traits. *P*-values  $\leq .05$  are highlighted in bold. Significant *P*-values denote whether the overlap is  
 284 greater than expected by chance from a one-sided randomisation test.

| <i>T. bartmani</i>     |        |            |                 | <i>T. podura</i>       |        |            |                 |
|------------------------|--------|------------|-----------------|------------------------|--------|------------|-----------------|
| CHC                    | X-fold | Observed   | <i>P</i> -value | CHC                    | X-fold | Observed   | <i>P</i> -value |
| F-penta                | 1.06   | 0.000439   | 0.128           | F-penta                | 1.07   | 0.0004425  | 0.059           |
| F-hepta                | 1.02   | 0.000301   | 0.271           | F-hepta                | 1.01   | 0.0002928  | 0.457           |
| F-nona                 | 0.99   | 0.000264   | 0.526           | F-nona                 | 0.94   | 0.00024994 | 0.909           |
| M-penta                | 0.96   | 0.000345   | 0.781           | M-penta                | 0.99   | 0.00035676 | 0.551           |
| M-hepta                | 1.07   | 0.000508   | 0.072           | M-hepta                | 1.03   | 0.00048354 | 0.265           |
| M-nona                 | 0.9    | 0.000325   | 0.576           | M-nona                 | 0.98   | 0.00032352 | 0.641           |
| <i>T. chumash</i>      |        |            |                 | <i>T. cristinae</i>    |        |            |                 |
| CHC                    | X-fold | Observed   | <i>P</i> -value | CHC                    | X-fold | Observed   | <i>P</i> -value |
| F-penta                | 0.89   | 0.00036706 | 0.983           | F-penta                | 1.01   | 0.00041936 | 0.217           |
| F-hepta                | 0.94   | 0.00027501 | 0.898           | F-hepta                | 1.01   | 0.00029503 | 0.266           |
| F-nona                 | 0.98   | 0.00025862 | 0.674           | F-nona                 | 0.94   | 0.00024953 | 0.997           |
| M-penta                | 0.99   | 0.00035754 | 0.512           | M-penta                | 0.99   | 0.0003586  | 0.509           |
| M-hepta                | 0.97   | 0.00045792 | 0.712           | M-hepta                | 0.95   | 0.00044654 | 0.992           |
| M-nona                 | 1.06   | 0.00034639 | 0.122           | M-nona                 | 0.97   | 0.00031857 | 0.942           |
| <i>T. knulli</i>       |        |            |                 | <i>T. poppensis</i>    |        |            |                 |
| CHC                    | X-fold | Observed   | <i>P</i> -value | CHC                    | X-fold | Observed   | <i>P</i> -value |
| F-penta                | 0.96   | 0.00039798 | 0.859           | F-penta                | 0.98   | 0.00040417 | 0.689           |
| F-hepta                | 1.02   | 0.00029934 | 0.201           | F-hepta                | 0.99   | 0.00029192 | 0.521           |
| F-nona                 | 1.03   | 0.00027378 | 0.132           | F-nona                 | 0.96   | 0.00025463 | 0.856           |
| M-penta                | 1.02   | 0.00036701 | 0.232           | M-penta                | 1      | 0.00036056 | 0.429           |
| M-hepta                | 0.99   | 0.00046794 | 0.554           | M-hepta                | 1.03   | 0.00048384 | 0.208           |
| M-nona                 | 1      | 0.00033049 | 0.465           | M-nona                 | 1.07   | 0.00035128 | <b>0.024</b>    |
| <i>T. landelsensis</i> |        |            |                 | <i>T. californicum</i> |        |            |                 |
| CHC                    | X-fold | Observed   | <i>P</i> -value | CHC                    | X-fold | Observed   | <i>P</i> -value |
| F-penta                | 0.94   | 0.00039035 | 0.951           | F-penta                | 0.97   | 0.00040217 | 0.753           |
| F-hepta                | 0.98   | 0.00028747 | 0.684           | F-hepta                | 0.99   | 0.00028878 | 0.601           |
| F-nona                 | 0.97   | 0.00025692 | 0.819           | F-nona                 | 0.98   | 0.00026206 | 0.625           |
| M-penta                | 0.98   | 0.00035169 | 0.726           | M-penta                | 0.96   | 0.00034453 | 0.892           |
| M-hepta                | 1.03   | 0.00048427 | 0.201           | M-hepta                | 1.05   | 0.00049524 | 0.071           |
| M-nona                 | 1.02   | 0.00033471 | 0.304           | M-nona                 | 1.01   | 0.00033312 | 0.333           |

285



286 Supplementary Table 7: X-fold enrichments and associated *P*-values for number of overlapping SNP windows  
 287 for PC2 for comparison with CHC experiment. Observed value gives the mean posterior inclusions probability  
 288 (i.e., probability of a genotype-phenotype association) across all SNPs in 100 Kb windows for each of the six  
 289 CHC traits. *P*-values  $\leq .05$  are highlighted in bold. Significant *P*-values denote whether the overlap is greater  
 290 than expected by chance from a one-sided randomisation test.

| <i>T. bartmani</i>     |        |            |                 | <i>T. podura</i>       |        |            |                 |
|------------------------|--------|------------|-----------------|------------------------|--------|------------|-----------------|
| CHC                    | X-fold | Observed   | <i>P</i> -value | CHC                    | X-fold | Observed   | <i>P</i> -value |
| F-penta                | 0.97   | 0.000403   | 0.681           | F-penta                | 0.99   | 0.00041351 | 0.486           |
| F-hepta                | 1.05   | 0.000306   | 0.143           | F-hepta                | 0.92   | 0.00027053 | 0.978           |
| F-nona                 | 1      | 0.000265   | 0.494           | F-nona                 | 1.06   | 0.00028006 | 0.089           |
| M-penta                | 0.96   | 0.000345   | 0.773           | M-penta                | 0.97   | 0.00035019 | 0.709           |
| M-hepta                | 0.96   | 0.000455   | 0.734           | M-hepta                | 1.05   | 0.00049492 | 0.113           |
| M-nona                 | 0.99   | 0.000326   | 0.573           | M-nona                 | 0.89   | 0.0002953  | 0.994           |
| <i>T. chumash</i>      |        |            |                 | <i>T. cristinae</i>    |        |            |                 |
| CHC                    | X-fold | Observed   | <i>P</i> -value | CHC                    | X-fold | Observed   | <i>P</i> -value |
| F-penta                | 1.01   | 0.00041693 | 0.417           | F-penta                | 1.05   | 0.0004352  | <b>0.009</b>    |
| F-hepta                | 0.95   | 0.00027777 | 0.863           | F-hepta                | 0.98   | 0.00028726 | 0.805           |
| F-nona                 | 1.04   | 0.00027621 | 0.191           | F-nona                 | 1.01   | 0.00026784 | 0.286           |
| M-penta                | 1.05   | 0.00037559 | 0.172           | M-penta                | 1.01   | 0.00036299 | 0.286           |
| M-hepta                | 0.98   | 0.00046092 | 0.628           | M-hepta                | 0.96   | 0.00045164 | 0.976           |
| M-nona                 | 0.92   | 0.00030343 | 0.955           | M-nona                 | 0.99   | 0.00032555 | 0.681           |
| <i>T. knulli</i>       |        |            |                 | <i>T. poppensis</i>    |        |            |                 |
| CHC                    | X-fold | Observed   | <i>P</i> -value | CHC                    | X-fold | Observed   | <i>P</i> -value |
| F-penta                | 1.02   | 0.00041785 | 0.295           | F-penta                | 1.03   | 0.00042699 | 0.171           |
| F-hepta                | 1.02   | 0.00029805 | 0.221           | F-hepta                | 1.04   | 0.0003051  | 0.087           |
| F-nona                 | 0.98   | 0.00025978 | 0.738           | F-nona                 | 0.97   | 0.00025664 | 0.811           |
| M-penta                | 0.97   | 0.00034943 | 0.806           | M-penta                | 1.06   | 0.0003824  | <b>0.042</b>    |
| M-hepta                | 0.99   | 0.00046472 | 0.612           | M-hepta                | 1.05   | 0.00049262 | 0.093           |
| M-nona                 | 1      | 0.00032921 | 0.471           | M-nona                 | 0.97   | 0.00032084 | 0.772           |
| <i>T. landelsensis</i> |        |            |                 | <i>T. californicum</i> |        |            |                 |
| CHC                    | X-fold | Observed   | <i>P</i> -value | CHC                    | X-fold | Observed   | <i>P</i> -value |
| F-penta                | 0.92   | 0.00038096 | 0.987           | F-penta                | 0.95   | 0.00039456 | 0.895           |
| F-hepta                | 0.97   | 0.0002817  | 0.864           | F-hepta                | 0.93   | 0.00027181 | 0.99            |
| F-nona                 | 1.01   | 0.00026628 | 0.43            | F-nona                 | 1.01   | 0.00026813 | 0.346           |
| M-penta                | 0.99   | 0.00035724 | 0.517           | M-penta                | 1.05   | 0.00037699 | 0.062           |
| M-hepta                | 1.01   | 0.00047379 | 0.437           | M-hepta                | 1.01   | 0.00047356 | 0.395           |
| M-nona                 | 0.99   | 0.00032686 | 0.561           | M-nona                 | 0.96   | 0.00031934 | 0.831           |

291 Supplementary Table 8: X-fold enrichments and associated *P*-values for number of overlapping SNP windows  
 292 for PC3 for comparison with CHC experiment. Observed value gives the mean posterior inclusions probability  
 293 (i.e., probability of a genotype-phenotype association) across all SNPs in 100 Kb windows for each of the six  
 294 CHC traits. *P*-values  $\leq .05$  are highlighted in bold. Significant *P*-values denote whether the overlap is greater  
 295 than expected by chance from a one-sided randomisation test.

| <i>T. bartmani</i>     |        |            |                 | <i>T. podura</i>       |        |            |                 |
|------------------------|--------|------------|-----------------|------------------------|--------|------------|-----------------|
| CHC                    | X-fold | Observed   | <i>P</i> -value | CHC                    | X-fold | Observed   | <i>P</i> -value |
| F-penta                | 1.06   | 0.000439   | 0.128           | F-penta                | 1.03   | 0.00042715 | 0.222           |
| F-hepta                | 1.02   | 0.000301   | 0.271           | F-hepta                | 1.04   | 0.00030464 | 0.132           |
| F-nona                 | 0.99   | 0.000264   | 0.526           | F-nona                 | 0.93   | 0.00024736 | 0.948           |
| M-penta                | 0.96   | 0.000345   | 0.781           | M-penta                | 1.08   | 0.00038877 | <b>0.029</b>    |
| M-hepta                | 1.07   | 0.000508   | 0.072           | M-hepta                | 1.09   | 0.00051268 | <b>0.028</b>    |
| M-nona                 | 0.9    | 0.000325   | 0.576           | M-nona                 | 0.99   | 0.00032619 | 0.531           |
| <i>T. Chumash</i>      |        |            |                 | <i>T. cristinae</i>    |        |            |                 |
| CHC                    | X-fold | Observed   | <i>P</i> -value | CHC                    | X-fold | Observed   | <i>P</i> -value |
| F-penta                | 1.07   | 0.0004442  | 0.088           | F-penta                | 1.05   | 0.00043482 | <b>0.012</b>    |
| F-hepta                | 0.99   | 0.0002889  | 0.569           | F-hepta                | 1.01   | 0.00029312 | 0.393           |
| F-nona                 | 0.94   | 0.00024939 | 0.889           | F-nona                 | 1.03   | 0.00027351 | 0.051           |
| M-penta                | 1.03   | 0.00037132 | 0.216           | M-penta                | 0.99   | 0.00035579 | 0.666           |
| M-hepta                | 1.03   | 0.00048255 | 0.281           | M-hepta                | 0.98   | 0.00046005 | 0.832           |
| M-nona                 | 1.05   | 0.00034602 | 0.164           | M-nona                 | 0.98   | 0.00032394 | 0.791           |
| <i>T. knulli</i>       |        |            |                 | <i>T. poppensis</i>    |        |            |                 |
| CHC                    | X-fold | Observed   | <i>P</i> -value | CHC                    | X-fold | Observed   | <i>P</i> -value |
| F-penta                | 1.05   | 0.00043564 | 0.054           | F-penta                | 1.06   | 0.00043928 | <b>0.034</b>    |
| F-hepta                | 0.99   | 0.0002911  | 0.547           | F-hepta                | 0.97   | 0.00028301 | 0.832           |
| F-nona                 | 0.97   | 0.00025644 | 0.842           | F-nona                 | 0.96   | 0.00025389 | 0.894           |
| M-penta                | 1.03   | 0.00036955 | 0.141           | M-penta                | 0.93   | 0.00033533 | 0.981           |
| M-hepta                | 0.99   | 0.00046841 | 0.563           | M-hepta                | 0.98   | 0.0004604  | 0.723           |
| M-nona                 | 0.99   | 0.00032395 | 0.676           | M-nona                 | 0.96   | 0.00031526 | 0.903           |
| <i>T. landelsensis</i> |        |            |                 | <i>T. californicum</i> |        |            |                 |
| CHC                    | X-fold | Observed   | <i>P</i> -value | CHC                    | X-fold | Observed   | <i>P</i> -value |
| F-penta                | 1.03   | 0.0004247  | 0.236           | F-penta                | 1.02   | 0.0004232  | 0.268           |
| F-hepta                | 1.03   | 0.00030062 | 0.175           | F-hepta                | 0.95   | 0.00027931 | 0.913           |
| F-nona                 | 0.99   | 0.00026403 | 0.532           | F-nona                 | 0.97   | 0.00026    | 0.732           |
| M-penta                | 0.97   | 0.00034978 | 0.769           | M-penta                | 0.98   | 0.00035164 | 0.713           |
| M-hepta                | 0.95   | 0.00044452 | 0.939           | M-hepta                | 1.05   | 0.00049509 | 0.068           |
| M-nona                 | 1.05   | 0.00034642 | 0.056           | M-nona                 | 0.99   | 0.00032631 | 0.594           |

297 Supplementary Table 9: Proportion of variation explained by the TREEMIX [8] population graph with  
298 different numbers of migration edges.  
299

| Number of migration edges | Proportion of variation explained |
|---------------------------|-----------------------------------|
| 0                         | 0.997                             |
| 1                         | 0.998                             |
| 2                         | 0.998                             |
| 3                         | 0.998                             |
| 4                         | 0.999                             |
| 5                         | 0.999                             |
| 6                         | 0.999                             |
| 7                         | 0.999                             |
| 8                         | 0.999                             |
| 9                         | 0.999                             |

300  
301

302 **SUPPLEMENTARY FIGURES**

303 SUPPLEMENTARY FIGURES 1, 2, 3: Plots shows parameter estimates with standardized coefficients for  
304 the full model for PC1, PC2, and PC3 for the permuted data sets compared to the original data set. The PC  
305 variables were randomized before running BayPass. This test was implemented for all eight species and 56  
306 species pairs. Here the gray points denote estimates for permuted data sets, and red points indicate estimates of  
307 original data. Gray lines indicate 95% equal-tail probability intervals (ETPIs). Estimates diverging from zero  
308 indicate a positive or negative effect of ecology or genetics on parallelism.

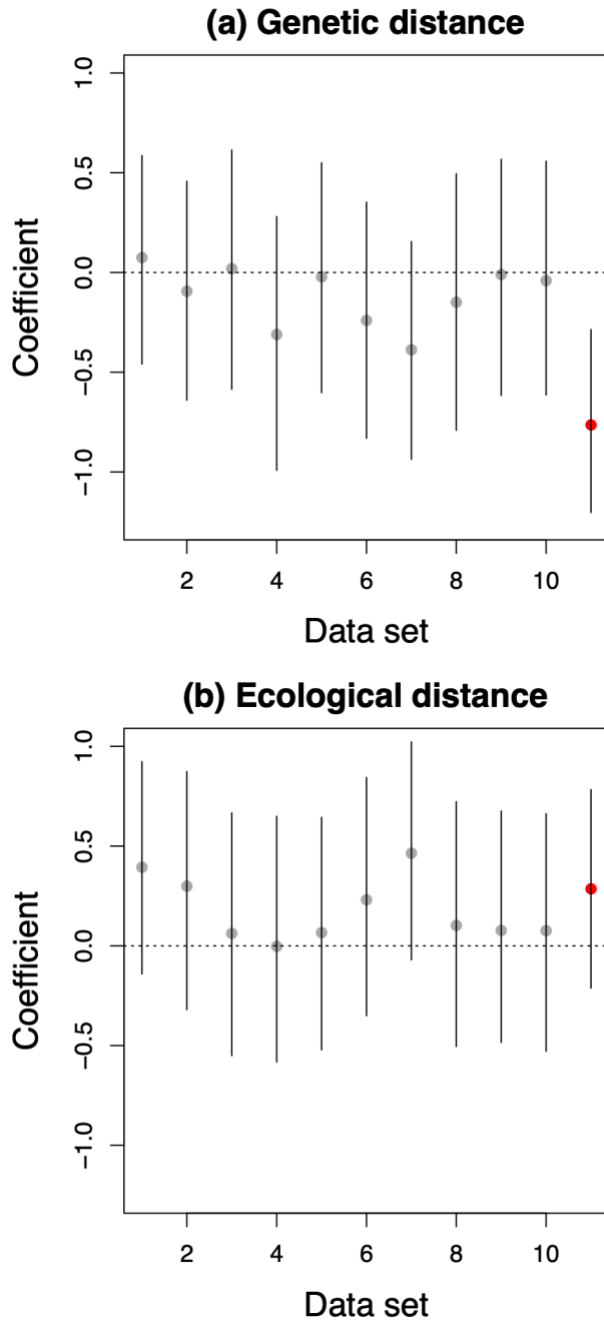

309

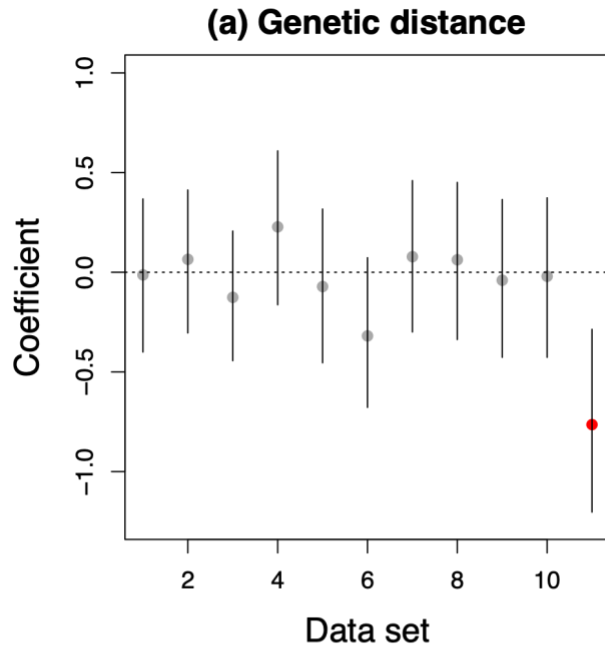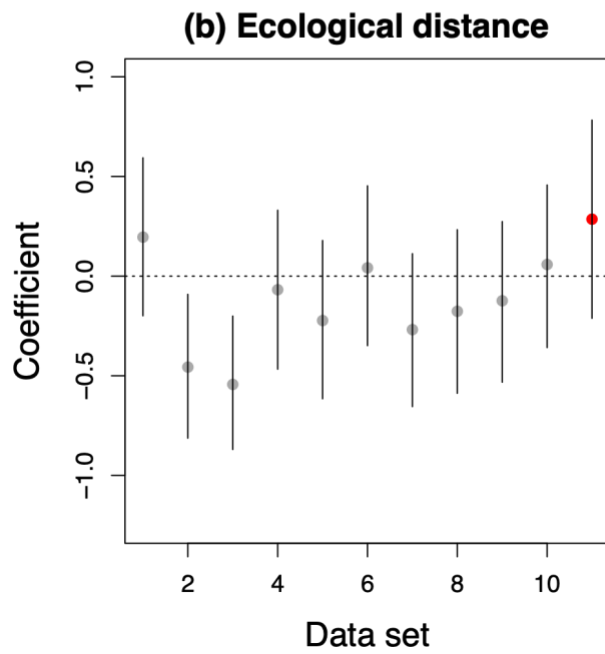

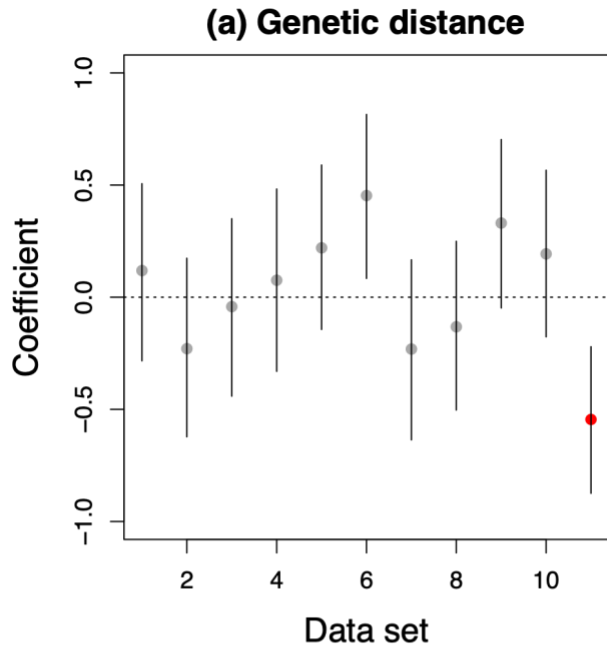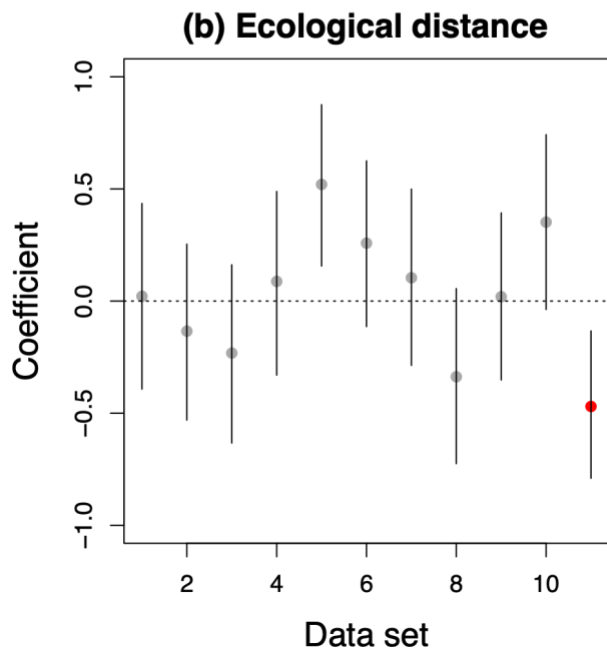

312 SUPPLEMENTARY FIGURE 4: Tests for parallel climate-associated SNP windows between species of  
 313 *Timema* stick insects (all plots are for the top 10% empirical quantile) using randomized PC1 variables before  
 314 running BayPass. Bars denote the x-fold enrichments for the number of overlapping climate-associated SNP  
 315 windows for PC1 for multi-species comparisons between 2 or more, 3 or more, and 4 or more species  
 316 generated in the randomisations. N values above each bar indicate the number of overlapping climate-  
 317 associated SNP windows for each comparison in the randomisations. Red dot above each bar indicates the x-  
 318 fold enrichment for each comparison determined for the original dataset. \* Indicates x-fold enrichments of  
 319 permuted data sets with P-value < 0.05.  
 320

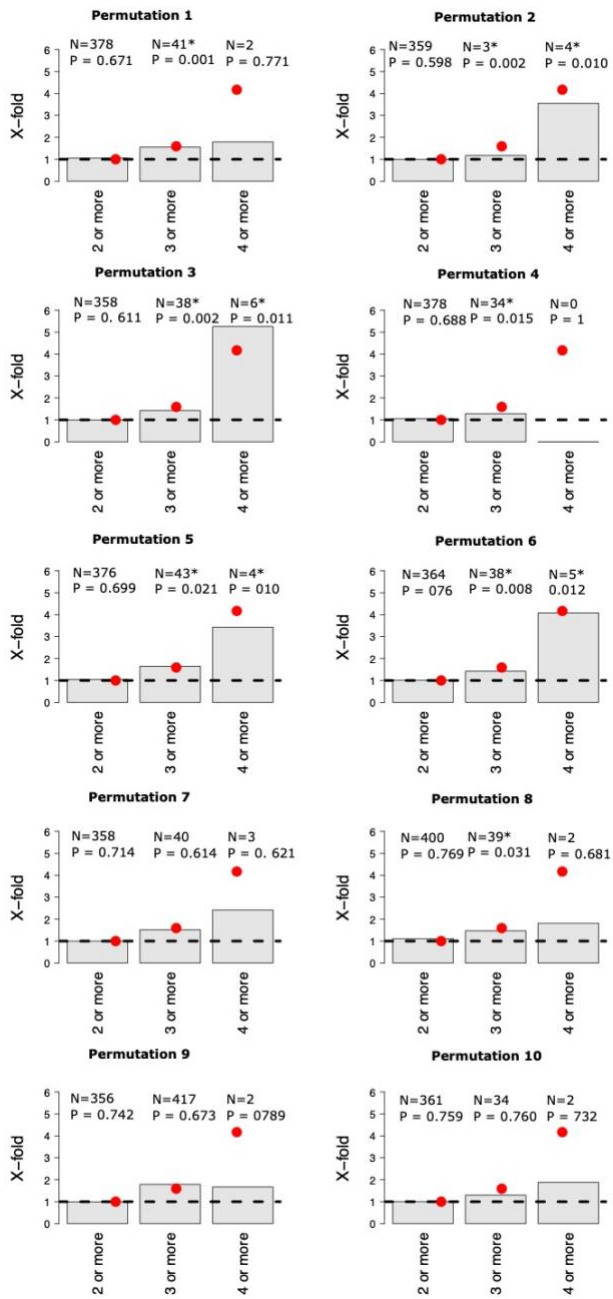

321

322

323 SUPPLEMENTARY FIGURE 5: Tests for parallel climate-associated SNP windows between species of  
 324 *Timema* stick insects (all plots are for the top 10% empirical quantile) using randomized PC2 variables before  
 325 running BayPass. Bars denote the x-fold enrichments for the number of overlapping climate-associated SNP  
 326 windows for PC2 for multi-species comparisons between 2 or more, 3 or more, and 4 or more species  
 327 generated in the randomisations. N values above each bar indicate the number of overlapping climate-  
 328 associated SNP windows for each comparison in the randomisations. Red dot above each bar indicates the x-  
 329 fold enrichment for each comparison determined for the original dataset. \* Indicates x-fold enrichments of  
 330 permuted data sets with P- value  $\leq 0.05$ .

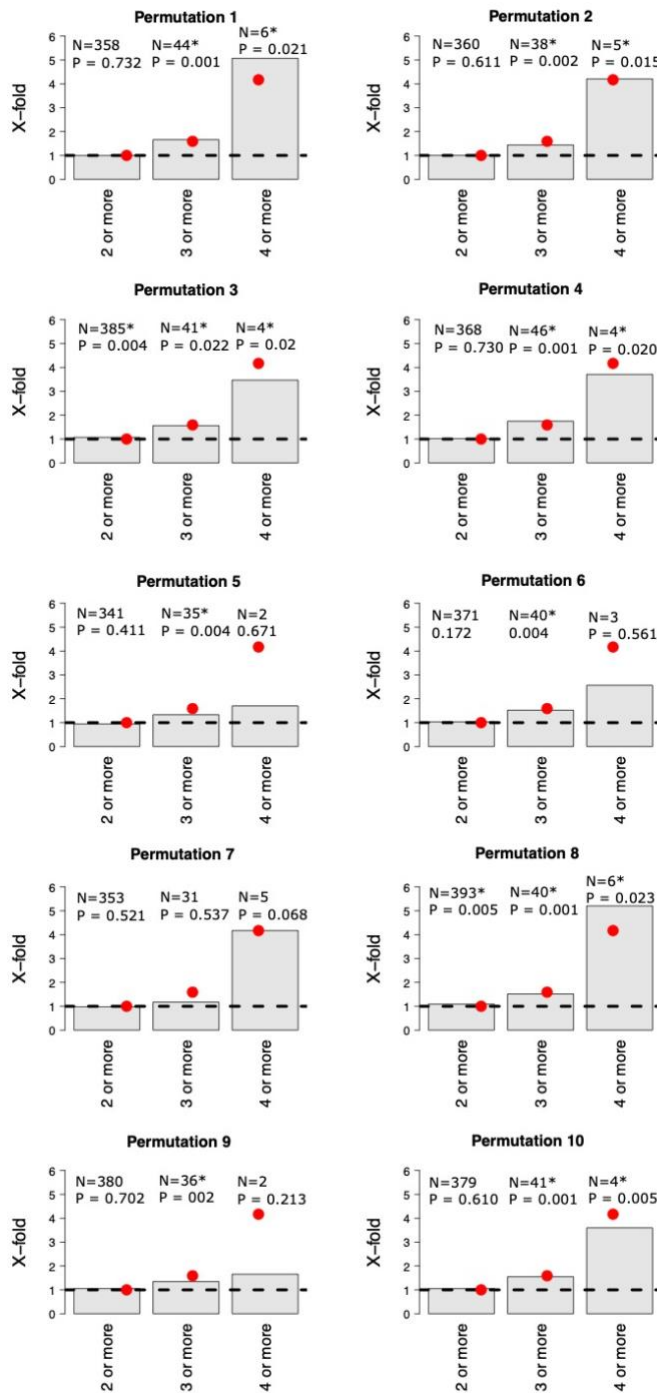

331



332 SUPPLEMENTARY FIGURE 6: Tests for parallel climate-associated SNP windows between species of  
 333 *Timema* stick insects (all plots are for the top 10% empirical quantile) using randomized PC3 variables before  
 334 running BayPass. Bars denote the x-fold enrichments for the number of overlapping climate-associated SNP  
 335 windows for PC3 for multi-species comparisons between 2 or more, 3 or more, and 4 or more species  
 336 generated in the randomisations. N values above each bar indicate the number of overlapping climate-  
 337 associated SNP windows for each comparison in the randomisations. Red dot above each bar indicates the x-  
 338 fold enrichment for each comparison determined for the original dataset. \* Indicates x-fold enrichments of  
 339 permuted data sets with P-value  $\leq 0.05$ .

340

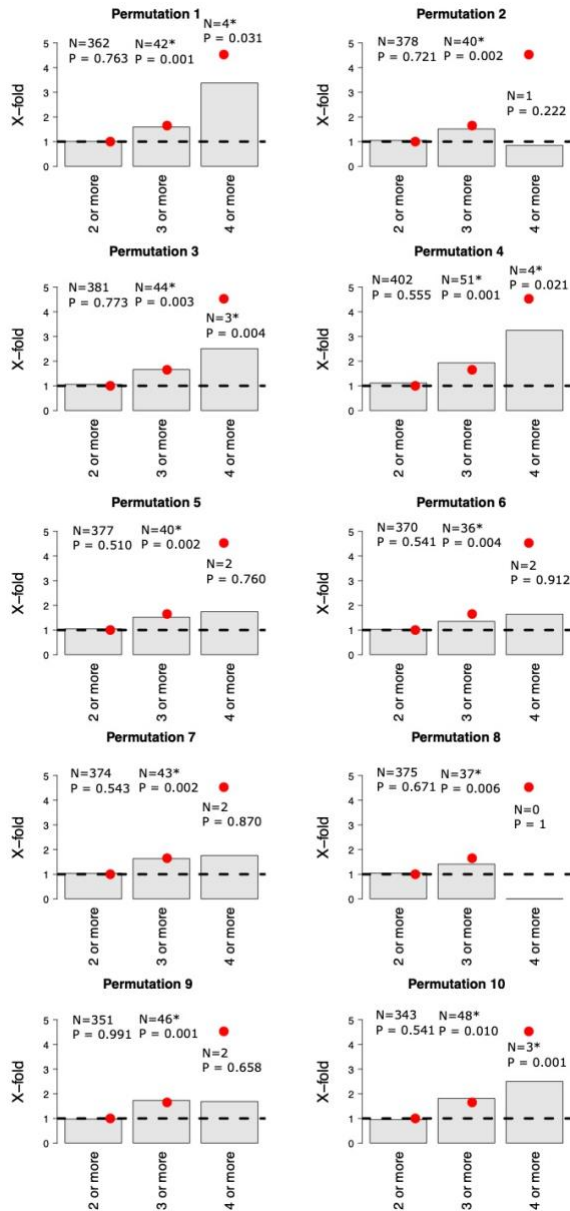

341  
 342

343

344 SUPPLEMENTARY FIGURES 7, 8, 9: Plots show summaries of population structure based on principal  
345 component analysis for eight species included in this study for PC1 vs. PC2 (Supplementary Figure 7), PC1 vs.  
346 PC3 (Supplementary Figure 8), and PC2 vs. PC3 (Supplementary Figure 9). Abbreviations indicate  
347 populations corresponding to SUPPLEMENTARY TABLE 1.

348

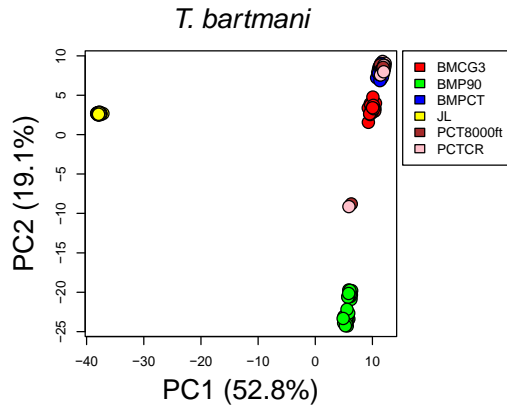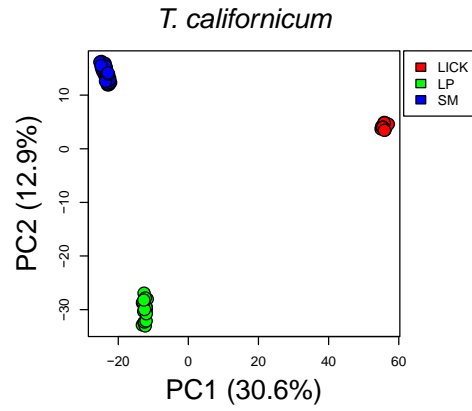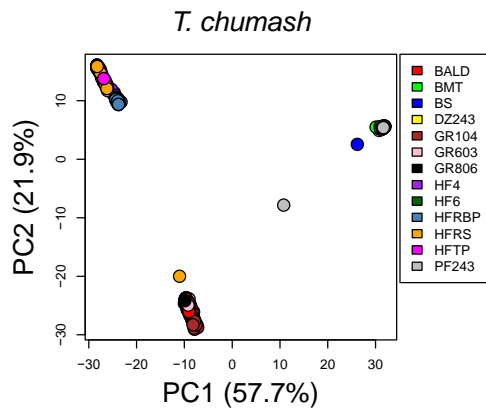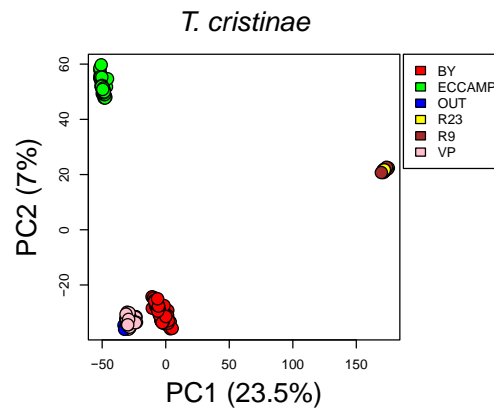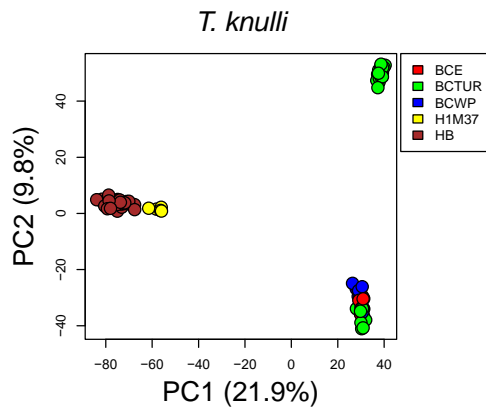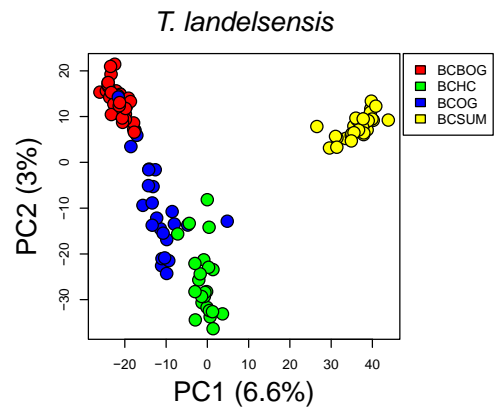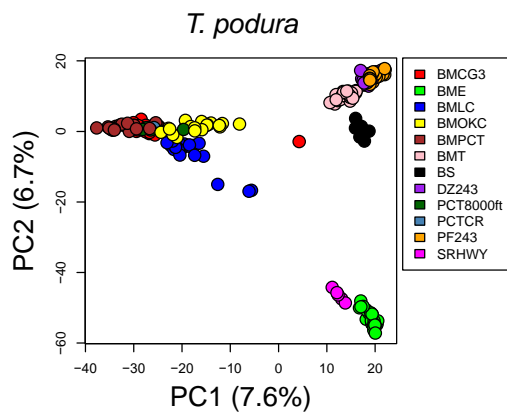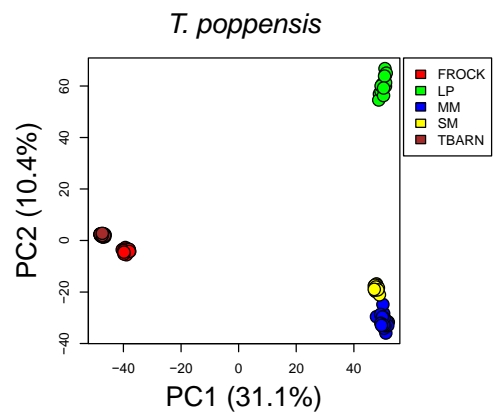

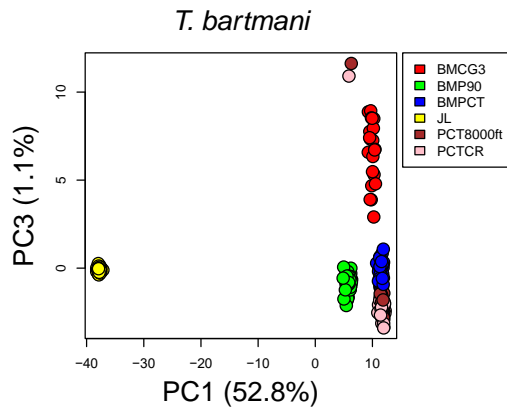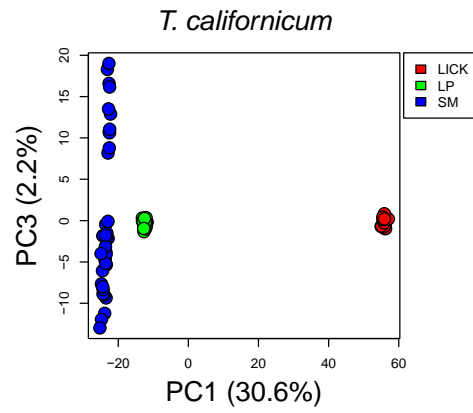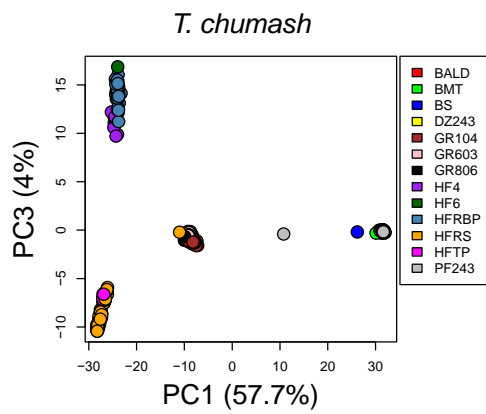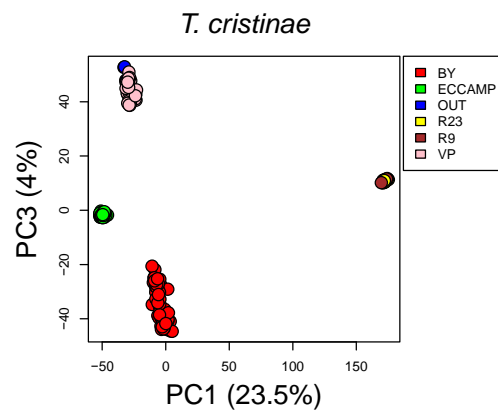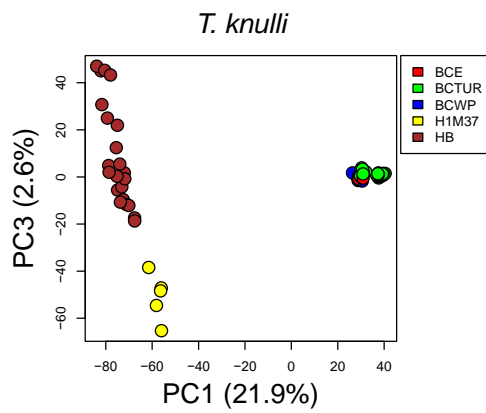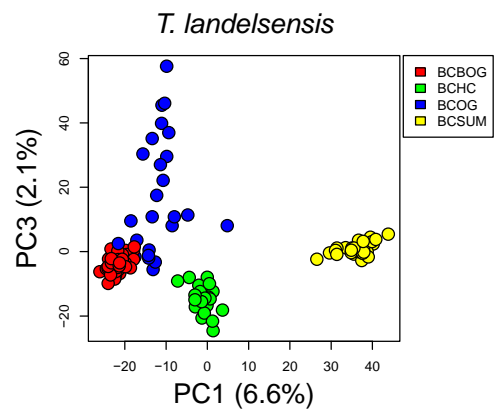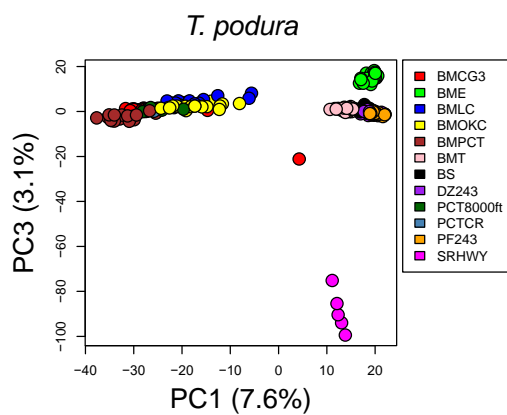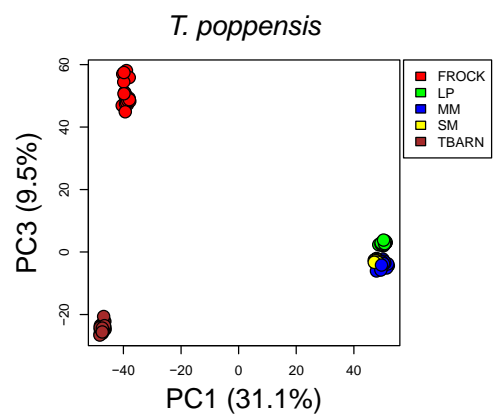

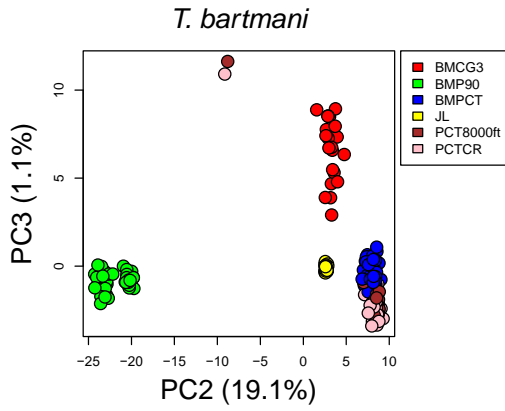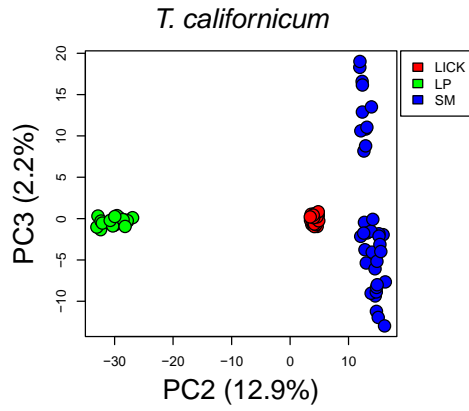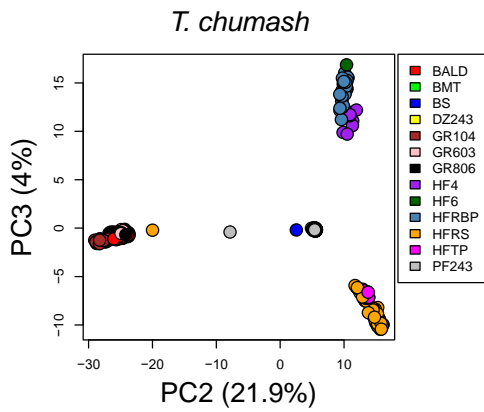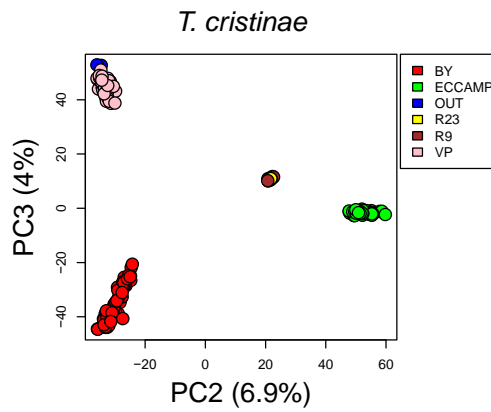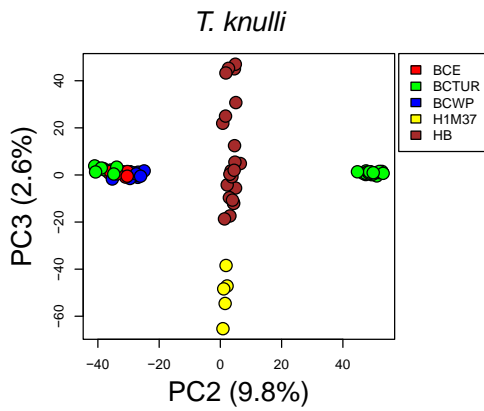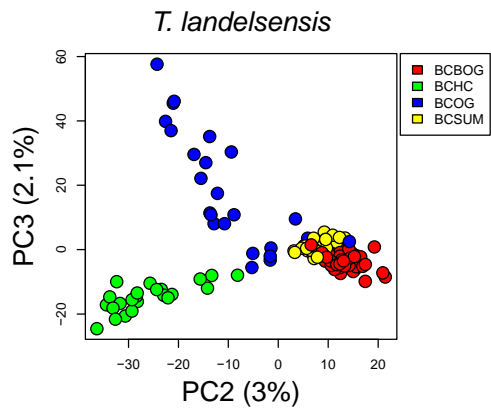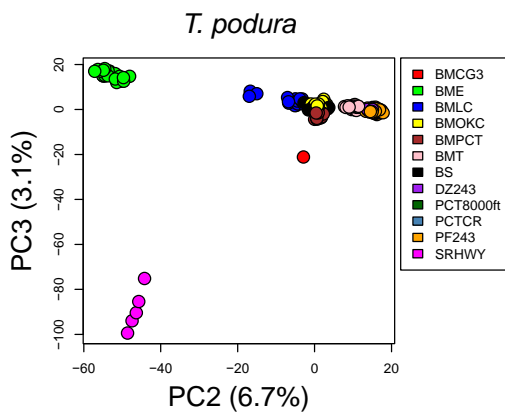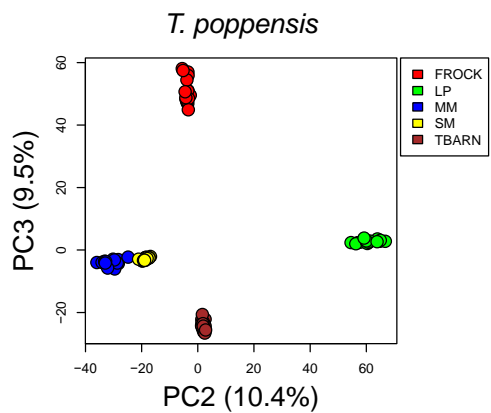

Supplement: EMS154228-supplement-Supplementary_information.pdf [file EMS154228-supplement-Supplementary_information.pdf]
